# Supplementary material
Source: MDPI journal article supplement (https://www.mdpi.com/2071-1050/15/15/11751)
Supplement: s1 [file s1]

Supplementary information

# Correlation between the experimental and theoretical photoelectrochemical response of a WO<sub>3</sub> electrode for efficient water splitting through the implementation of an artificial neural network

Mamy Diaby<sup>1,2</sup>, Asma Alimi<sup>1,3</sup>, Afrah Bardaoui<sup>1</sup>, Diogo M.F. Santos<sup>4\*</sup>, Radhaoune Chtourou<sup>1</sup> and Ibtissem Ben As-saker<sup>1\*</sup>

\* Correspondence: diogosantos@tecnico.ulisboa.pt (D.M.F.S.) ibtissembassaker@gmail.com; Tel.: 00216 52 288 629 (I.B.A.)

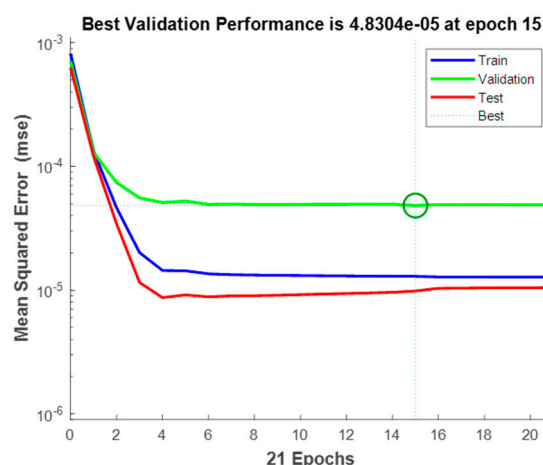

**Figure S1:** Performance of the LMANN model as a function of MSE during training, validation, and testing.

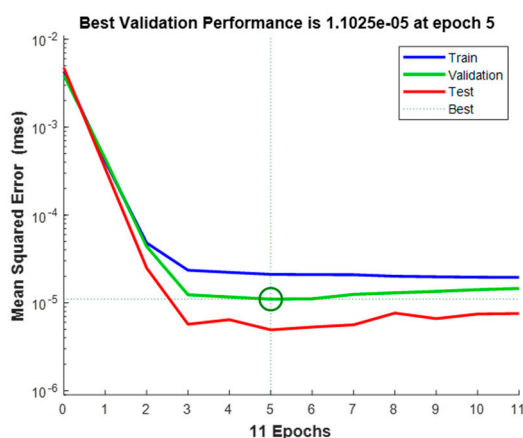

**Figure S2:** Performance of the SCGANN models as a function of MSE during training, validation, and testing.
